# Supplementary material
Source: publisher figshare collection journal article supplement (https://springernature.figshare.com/ndownloader/files/12533927)
Supplement: Supplementary file 1 [file 12533927]

| **lncRNA** | Average fold Change in TE1GR/TE1 | Average fold change in KYSE-450GR/KYSE-450 |
| --- | --- | --- |
|
| **ENST00000152931** | **6.05** | **1.67** |
| ENST00000424980 | 5.88 | 3.02 |
| ENST00000430635 | 4.76 | 3.35 |
| ENST00000412816 | 2.58 | 3.05 |
| ENST00000548172 | 3.59 | 2.39 |
| ENST00000413504 | 3.77 | 2.43 |

Additional file 2

Table S2: Fold change of deregulated lncRNAs between gefitinib-resistant cells and -parental cells
